# Supplementary material
Source: PubMed Central journal article supplement (PMC6207370)
Supplement: NIHMS1508357-supplement-Supp1.pdf [file NIHMS1508357-supplement-Supp1.pdf]

**A novel in vitro allometric scaling methodology for aldehyde oxidase substrates to enable selection of appropriate species for traditional allometry**

**Supplemental Information.**

**Supplemental Figure 1.**

Representative plot of S9  $CL_{int}$  vs Body Weight to obtain the allometric coefficients a and b, used to calculate a predicted human S9  $CL_{int}$  (eq. 6). Solid shapes represent experimental data obtained from incubations with S9 of the indicated species in the presence of NADPH. The open symbol represents the predicted human S9  $CL_{int}$  value, calculated from the simple allometric equation.

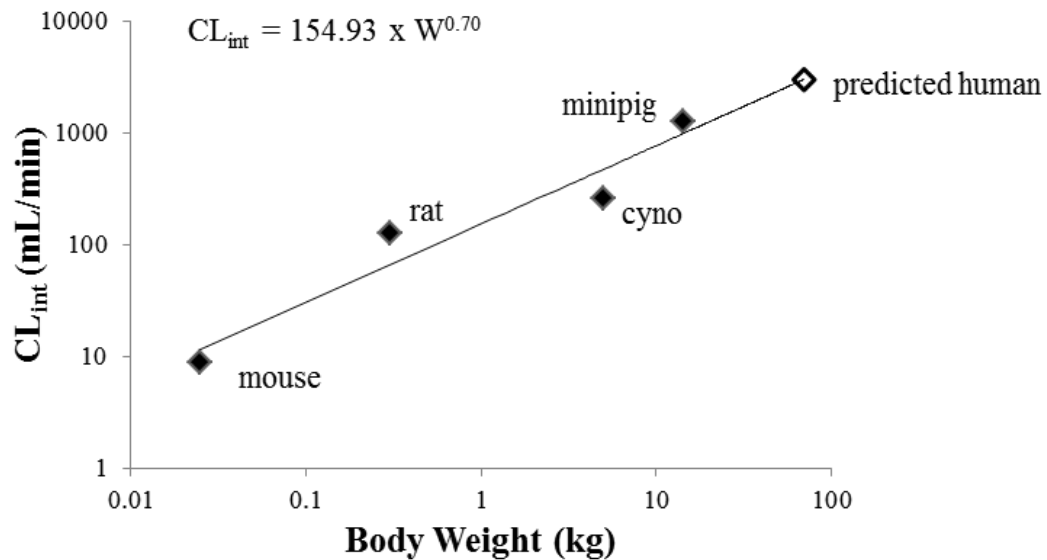

### Supplemental Table 1.

Species-specific hepatic scaling factors, hepatic blood flows, and body weights obtained from the literature for human and nonclinical species used in the estimation of hepatic intrinsic clearance ( $CL_{int}$ , eq. 1) and hepatic clearance ( $CL_{HEP}$ , eq. 2) obtained from incubations of substrate in hepatic S9 fractions.

| Species    | Scaling Factor<br>(g liver/kg body weight) | Hepatic Blood Flow<br>(mL/min/kg) | Body Weight<br>(kg) |
|------------|--------------------------------------------|-----------------------------------|---------------------|
| Mouse      | 87.5 <sup>a</sup>                          | 90 <sup>a</sup>                   | 0.02 <sup>a</sup>   |
| Rat        | 45 <sup>d</sup>                            | 70 <sup>c</sup>                   | 0.25 <sup>a,c</sup> |
| Guinea pig | 45 <sup>c</sup>                            | 61 <sup>c</sup>                   | 0.344 <sup>c</sup>  |
| Cynomolgus | 30 <sup>a</sup>                            | 44 <sup>a</sup>                   | 4                   |
| Rhesus     | 30 <sup>a</sup>                            | 44 <sup>a</sup>                   | 8                   |
| Minipig    | 17 <sup>b</sup>                            | 28 <sup>b</sup>                   | 14.2 <sup>b</sup>   |
| Human      | 20 <sup>d</sup>                            | 21 <sup>a</sup>                   | 70 <sup>a</sup>     |

<sup>a</sup> Davies B and Morris T. (1993). Physiological parameters in laboratory animals and humans. *Pharm Res* 10(7):1093-95.

<sup>b</sup> Suenderhauf C and Parrott N. (2013). A physiologically based pharmacokinetic model of minipig: data compilation and model implementation. *Pharm Res* 30(1):1-15.

<sup>c</sup> Boxenbaum H. (1980). Interspecies variation in liver weight, hepatic blood flow, and antipyrine intrinsic clearance: extrapolation of data to benzodiazepines and phenytoin. *J Pharmicokinet Biopharm* 8(2):165-76.

<sup>d</sup> Lin JH, Chiba M, Balani SK, et al. (1996). Species differences in the pharmacokinetics and metabolism of indinavir, a potent human immunodeficiency virus protease inhibitor. *Drug Metab Dispos* 24(10):1111-20.

**Supplemental Table 2.** Average absolute fold-error (AAFE), average fold-error (AFE), and percentage of compounds predicted within 2 or 3 fold-error of observed  $CL_{int}$  measured in human S9, as predicted by multispecies allometry.

| <b>Multispecies simple allometry</b> | AAFE | AFE  | % within 2 fold | % within 3 fold |
|--------------------------------------|------|------|-----------------|-----------------|
| Minipig/Rhesus/Rat/Mouse             | 1.9  | 1.2  | 40%             | 80%             |
| Minipig/Cyno/Rat/Mouse               | 2.0  | 1.5  | 40%             | 60%             |
| Minipig/Rhesus/Gpig/Mouse            | 1.9  | 1.2  | 40%             | 80%             |
| Minipig/Cyno/Gpig/Mouse              | 2.0  | 1.5  | 60%             | 60%             |
| Rhesus/Rat/Mouse                     | 1.7  | 1.7  | 80%             | 80%             |
| Cyno/Rat/Mouse                       | 3.3  | 3.3  | 20%             | 60%             |
| Rhesus/Gpig/Mouse                    | 2.2  | 1.9  | 60%             | 80%             |
| Cyno/Gpig/Mouse                      | 3.5  | 3.5  | 20%             | 40%             |
| Minipig/Rhesus/Rat                   | 2.3  | 1.2  | 40%             | 60%             |
| Minipig/Cyno/Rat                     | 2.4  | 1.4  | 40%             | 60%             |
| Minipig/Rhesus/Gpig                  | 2.2  | 1.0  | 40%             | 80%             |
| Minipig/Cyno/Gpig                    | 2.3  | 1.1  | 40%             | 60%             |
| Minipig/Gpig/Mouse                   | 2.4  | 1.0  | 40%             | 60%             |
| Minipig/Rat/Mouse                    | 2.3  | 0.92 | 40%             | 60%             |

Cyno = cynomolgus monkey; Gpig = guinea pig

**Supplemental Figure 2.** Plots of observed human S9  $CL_{int}$  vs that predicted from multi-species allometry. Inner dotted line represents unity, solid line represents 2-fold-error, and outer dashed line represents 3-fold-error. Zaleplon ( $\bullet$ ),  $O^6$ -benzylguanine ( $\blacksquare$ ), zonisipride ( $\circ$ ), BIBX1382 ( $\square$ ), and SGX523 ( $\ast$ ). Cyno, cynomolgus monkey; Gpig, guinea pig; Mpig, minipig

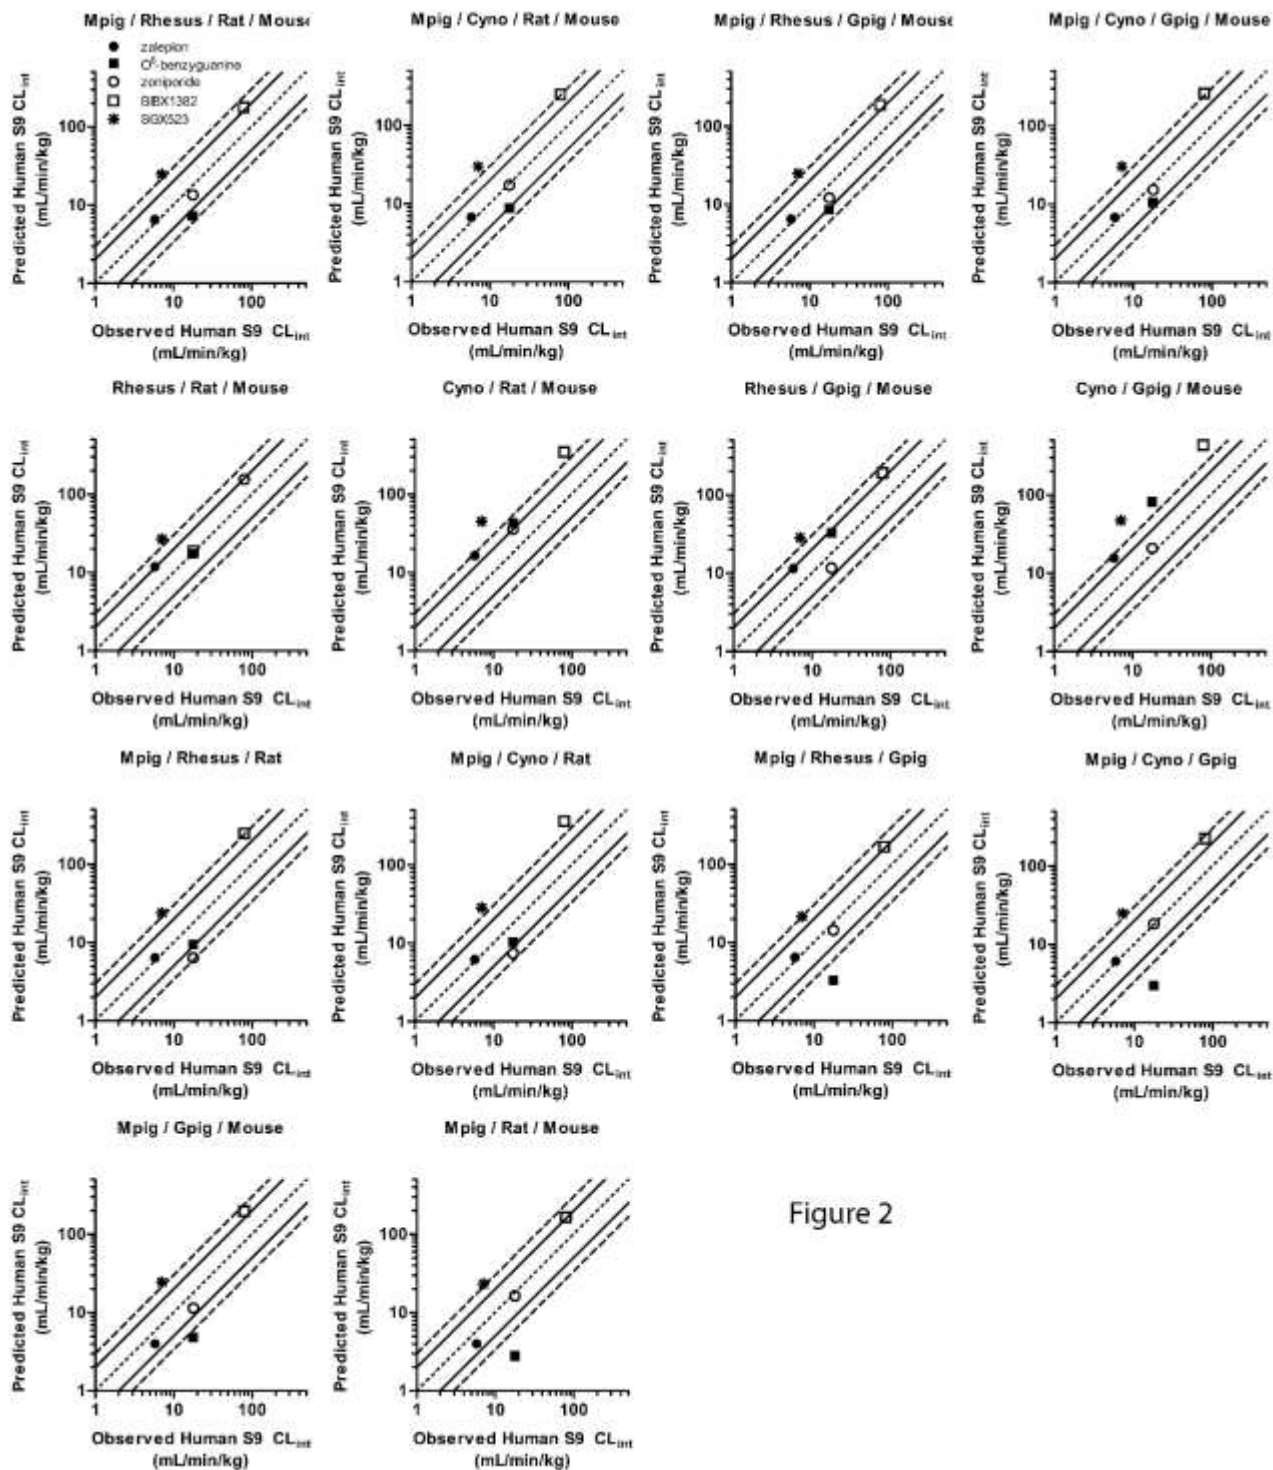

Figure 2

**Supplemental Table 3.**

Human predicted CL<sub>int</sub>, fold-error of prediction, and allometric exponent obtained from multispecies simple allometry. Cyno, cynomolgus monkey; Gpig, guinea pig

| CL <sub>int</sub> (mL/min/kg)    |                             |             |              |                               |             |              |                             |             |              |                             |            |              |                             |            |              |
|----------------------------------|-----------------------------|-------------|--------------|-------------------------------|-------------|--------------|-----------------------------|-------------|--------------|-----------------------------|------------|--------------|-----------------------------|------------|--------------|
|                                  | Zaleplon                    |             |              | O <sup>6</sup> -Benzylguanine |             |              | Zoniporide                  |             |              | BIBX1382                    |            |              | SGX523                      |            |              |
| Human Observed CL <sub>int</sub> | 5.8                         |             |              | 17.8                          |             |              | 17.9                        |             |              | 80.2                        |            |              | 7.1                         |            |              |
|                                  | Predicted CL <sub>int</sub> | Fold Error  | Exponent (b) | Predicted CL <sub>int</sub>   | Fold Error  | Exponent (b) | Predicted CL <sub>int</sub> | Fold Error  | Exponent (b) | Predicted CL <sub>int</sub> | Fold Error | Exponent (b) | Predicted CL <sub>int</sub> | Fold Error | Exponent (b) |
| Minipig/Rhesus/Rat/Mouse         | 6.52                        | <b>1.1</b>  | 0.837        | 7.31                          | <b>0.41</b> | 0.897        | 13.5                        | <b>0.75</b> | 0.539        | 177                         | <b>2.2</b> | 1.24         | 24.6                        | <b>3.5</b> | 0.940        |
| Minipig/Cyno/Rat/Mouse           | 6.82                        | <b>1.2</b>  | 0.837        | 8.82                          | <b>0.49</b> | 0.908        | 17.3                        | <b>0.97</b> | 0.571        | 248                         | <b>3.1</b> | 1.28         | 29.8                        | <b>4.2</b> | 0.962        |
| Minipig/Rhesus/Gpig/Mouse        | 6.48                        | <b>1.1</b>  | 0.838        | 8.64                          | <b>0.48</b> | 0.819        | 12.1                        | <b>0.68</b> | 0.608        | 187                         | <b>2.3</b> | 1.20         | 25.0                        | <b>3.5</b> | 0.933        |
| Minipig/Cyno/Gpig/Mouse          | 6.75                        | <b>1.2</b>  | 0.837        | 10.5                          | <b>0.59</b> | 0.834        | 15.4                        | <b>0.86</b> | 0.636        | 260                         | <b>3.2</b> | 1.24         | 30.3                        | <b>4.3</b> | 0.955        |
| Rhesus/Rat/Mouse                 | 11.9                        | <b>2.0</b>  | 0.924        | 18.9                          | <b>1.1</b>  | 1.03         | 17.6                        | <b>1.0</b>  | 0.577        | 155                         | <b>1.9</b> | 1.22         | 26.8                        | <b>3.8</b> | 0.952        |
| Cyno/Rat/Mouse                   | 16.5                        | <b>2.8</b>  | 0.968        | 43.0                          | <b>2.4</b>  | 1.14         | 35.9                        | <b>2.0</b>  | 0.679        | 348                         | <b>4.3</b> | 1.33         | 45.0                        | <b>6.4</b> | 1.02         |
| Rhesus/Gpig/Mouse                | 11.5                        | <b>2.0</b>  | 0.921        | 32.5                          | <b>1.8</b>  | 1.01         | 11.6                        | <b>0.65</b> | 0.602        | 190                         | <b>2.4</b> | 1.21         | 28.4                        | <b>4.0</b> | 0.951        |
| Cyno/Gpig/Mouse                  | 15.5                        | <b>2.7</b>  | 0.962        | 81.5                          | <b>4.6</b>  | 1.14         | 20.8                        | <b>1.2</b>  | 0.681        | 432                         | <b>5.4</b> | 1.32         | 47.4                        | <b>6.7</b> | 1.02         |
| Minipig/Rhesus/Rat               | 6.42                        | <b>1.1</b>  | 0.831        | 9.48                          | <b>0.53</b> | 1.00         | 6.42                        | <b>0.36</b> | 0.242        | 247                         | <b>3.1</b> | 1.37         | 23.9                        | <b>3.4</b> | 0.929        |
| Minipig/Cyno/Rat                 | 6.20                        | <b>1.1</b>  | 0.802        | 10.3                          | <b>0.58</b> | 0.965        | 7.36                        | <b>0.41</b> | 0.262        | 359                         | <b>4.5</b> | 1.41         | 28.4                        | <b>4.0</b> | 0.945        |
| Minipig/Rhesus/Gpig              | 6.50                        | <b>1.1</b>  | 0.839        | 3.27                          | <b>0.18</b> | 0.431        | 14.4                        | <b>0.81</b> | 0.677        | 167                         | <b>2.1</b> | 1.16         | 21.5                        | <b>3.0</b> | 0.871        |
| Minipig/Cyno/Gpig                | 6.13                        | <b>1.1</b>  | 0.802        | 3.00                          | <b>0.17</b> | 0.374        | 18.5                        | <b>1.0</b>  | 0.701        | 226                         | <b>2.8</b> | 1.19         | 24.9                        | <b>3.5</b> | 0.884        |
| Minipig/Gpig/Mouse               | 3.98                        | <b>0.68</b> | 0.773        | 4.83                          | <b>0.27</b> | 0.742        | 11.4                        | <b>0.64</b> | 0.600        | 197                         | <b>2.5</b> | 1.21         | 24.5                        | <b>3.5</b> | 0.930        |
| Minipig/Rat/Mouse                | 3.98                        | <b>0.68</b> | 0.772        | 2.85                          | <b>0.16</b> | 0.773        | 16.4                        | <b>0.92</b> | 0.565        | 165                         | <b>2.1</b> | 1.23         | 23.2                        | <b>3.3</b> | 0.932        |

**Supplemental Table 4.**Human predicted CL<sub>int</sub> and fold-error of prediction obtained from single-species scaling.

| <b>CL<sub>int</sub> (mL/min/kg)</b>    |                                       |                       |                                       |                       |                                       |                       |                                       |                       |                                       |                       |
|----------------------------------------|---------------------------------------|-----------------------|---------------------------------------|-----------------------|---------------------------------------|-----------------------|---------------------------------------|-----------------------|---------------------------------------|-----------------------|
|                                        | <b>Zaleplon</b>                       |                       | <b>O<sup>6</sup>-Benzylguanine</b>    |                       | <b>Zoniporide</b>                     |                       | <b>BIBX1382</b>                       |                       | <b>SGX523</b>                         |                       |
| <b>Human Observed CL<sub>int</sub></b> | <b>5.8</b>                            |                       | <b>17.8</b>                           |                       | <b>17.9</b>                           |                       | <b>80.2</b>                           |                       | <b>7.1</b>                            |                       |
|                                        | <b>Predicted<br/>CL<sub>int</sub></b> | <b>Fold<br/>Error</b> |
| <b>Cynomolgus monkey</b>               | 9.94                                  | <b>1.7</b>            | 20.8                                  | <b>1.2</b>            | 30.7                                  | <b>1.7</b>            | 88.7                                  | <b>1.1</b>            | 21.7                                  | <b>3.1</b>            |
| <b>Rhesus monkey</b>                   | 8.74                                  | <b>1.5</b>            | 13.3                                  | <b>0.75</b>           | 17.6                                  | <b>1.0</b>            | 66.4                                  | <b>0.83</b>           | 17.2                                  | <b>2.4</b>            |
| <b>Rat</b>                             | 3.81                                  | <b>0.65</b>           | 2.04                                  | <b>0.11</b>           | 114                                   | <b>6.4</b>            | 7.52                                  | <b>0.09</b>           | 8.64                                  | <b>1.2</b>            |
| <b>Mouse</b>                           | 3.17                                  | <b>0.54</b>           | 2.69                                  | <b>0.15</b>           | 43.1                                  | <b>2.4</b>            | 4.32                                  | <b>0.05</b>           | 5.13                                  | <b>0.72</b>           |
| <b>Minipig</b>                         | 3.73                                  | <b>0.64</b>           | 2.97                                  | <b>0.17</b>           | 15.7                                  | <b>0.88</b>           | 89.8                                  | <b>1.1</b>            | 17.1                                  | <b>2.4</b>            |
| <b>Guinea Pig</b>                      | 3.76                                  | <b>0.64</b>           | 16.0                                  | <b>0.90</b>           | 21.2                                  | <b>1.2</b>            | 19.2                                  | <b>0.24</b>           | 11.2                                  | <b>1.6</b>            |
